# Supplementary material for: Effect of COVID-19-Related Lockdown οn Hospital Admissions for Asthma and COPD Exacerbations: Associations with Air Pollution and Patient Characteristics
Source: J Pers Med. 2021 Aug 30;11(9):867. doi: 10.3390/jpm11090867 (PMC8465209; doi:10.3390/jpm11090867)

# **Effect of COVID-19-related lockdown on hospital admissions for asthma and COPD exacerbations: associations with air pollution and patient characteristics**

**Ioanna Sigala , Timoleon Gianakas, Vassilis G. Giannakoulis, Efthimios Zervas, Aikaterini Brinia, Niki Gianiou, Andreas Asimakos, Efi Dima, Ioannis Kalomenidis and Paraskevi Katsaounou**

## **Data Supplement**

**S1. Scatterplots of air pollutant levels and admissions per week (total, asthma and COPD) for the year 2020**

(All air pollutants are measured in  $\mu\text{g}/\text{m}^3$  while CO is measured in  $\text{mg}/\text{m}^3$ )

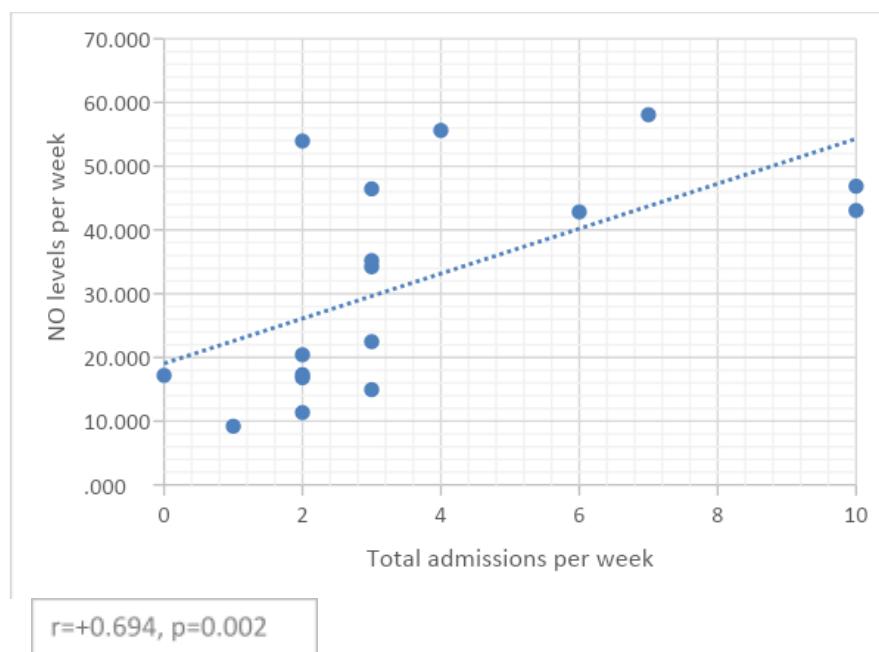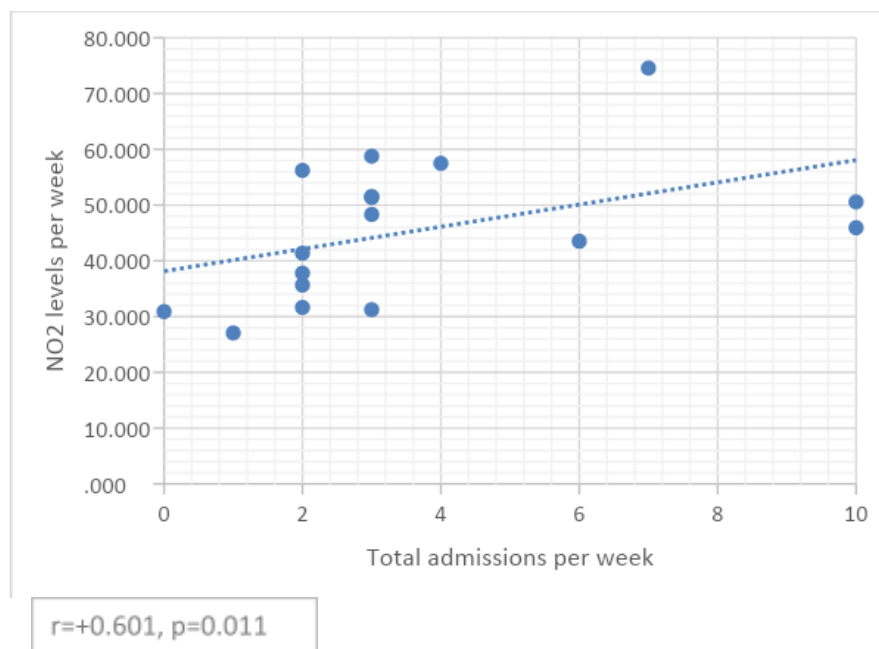

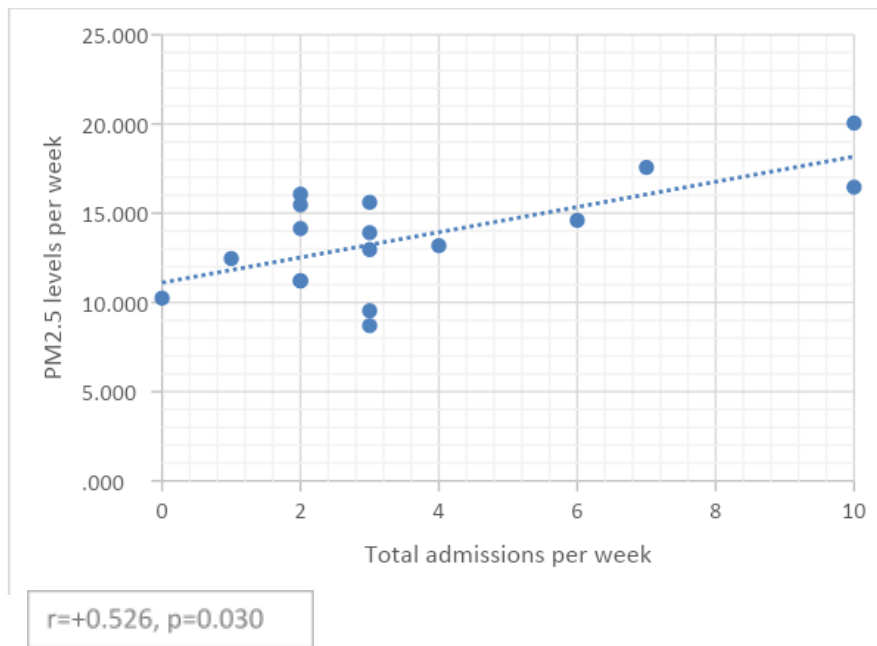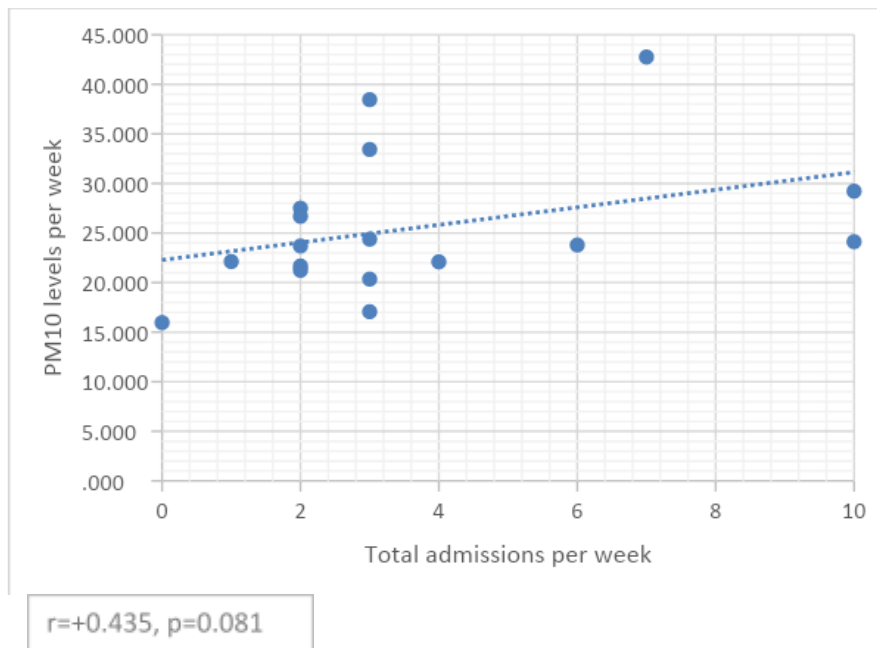

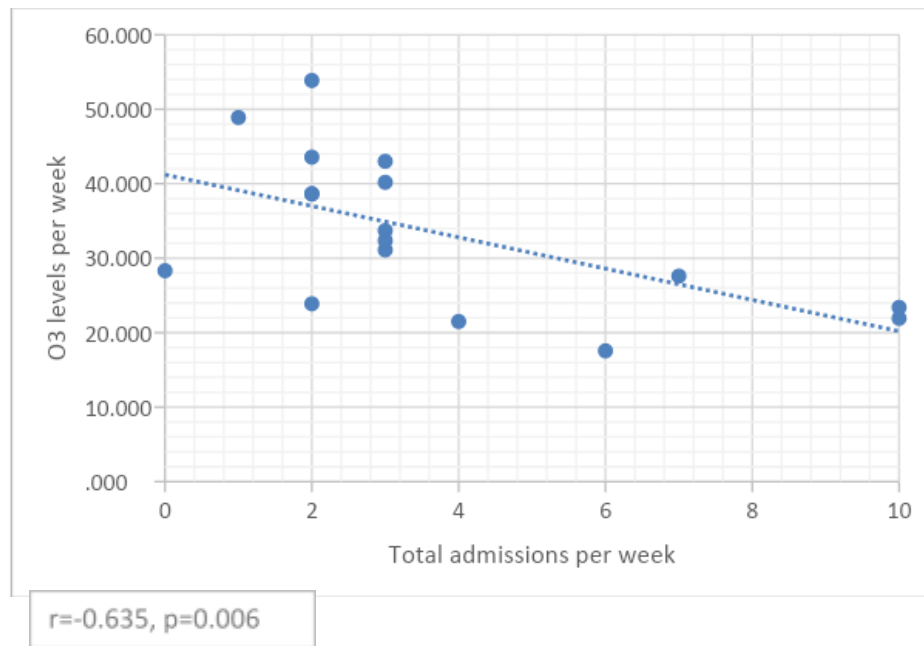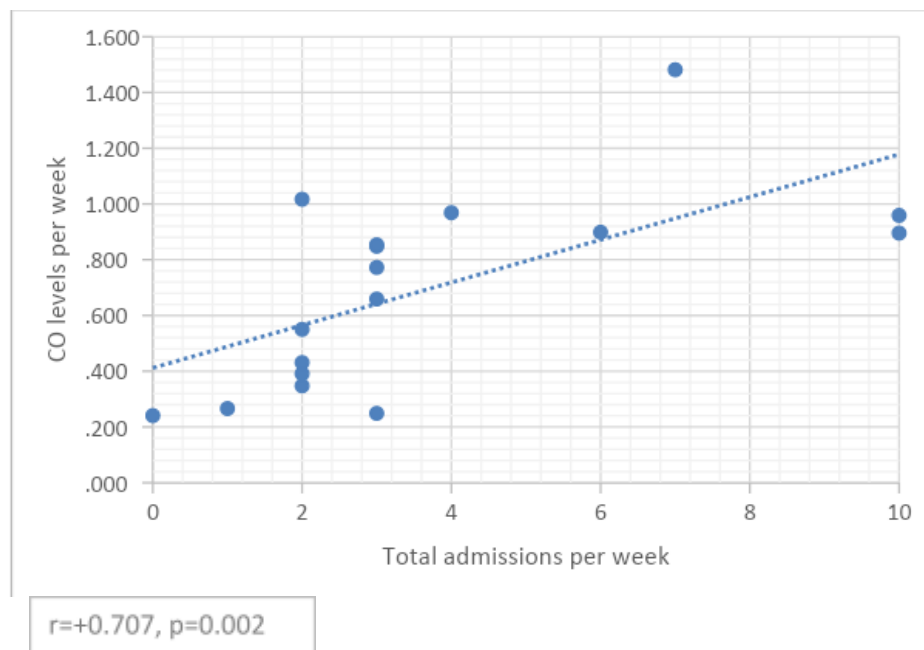

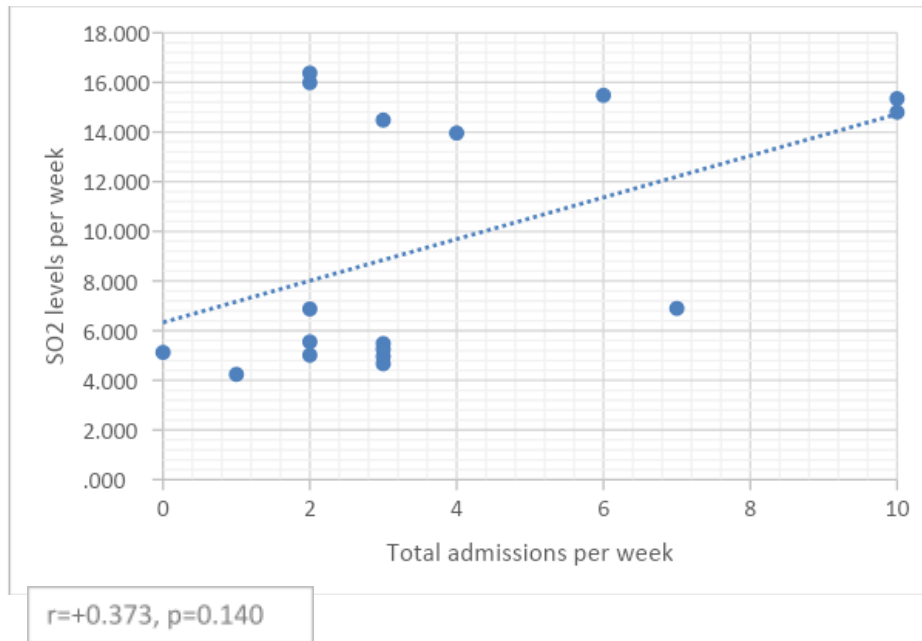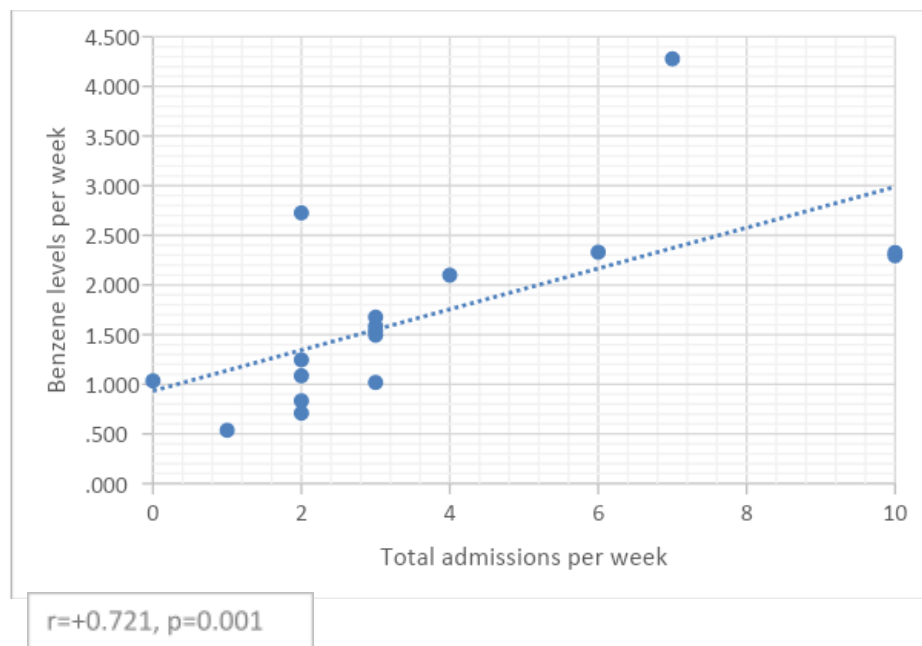

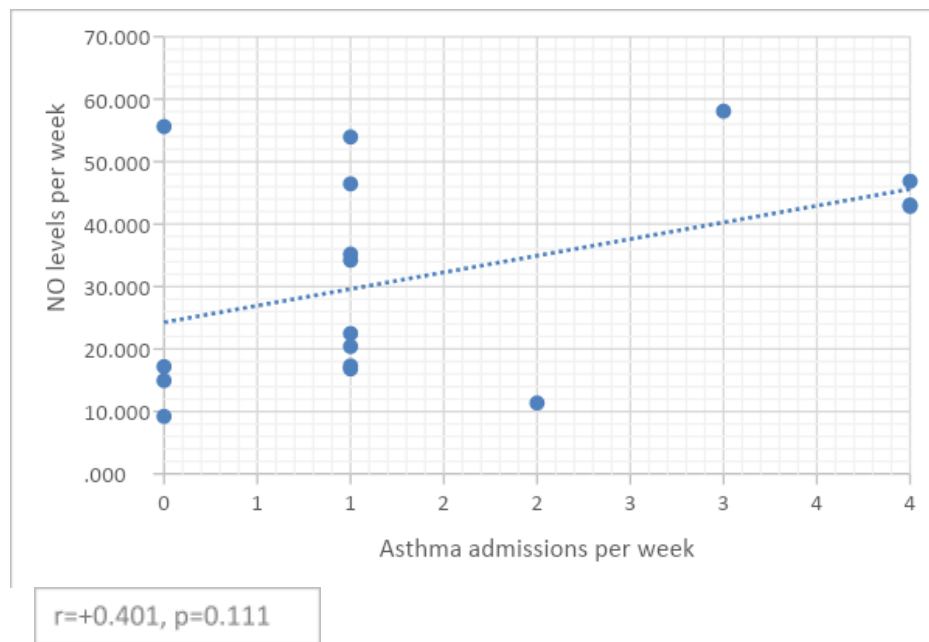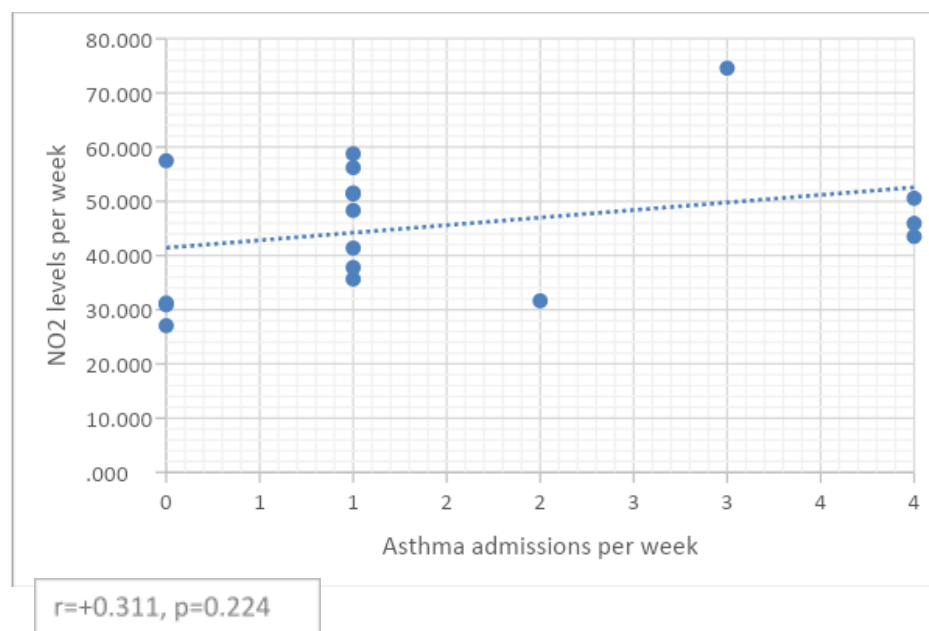

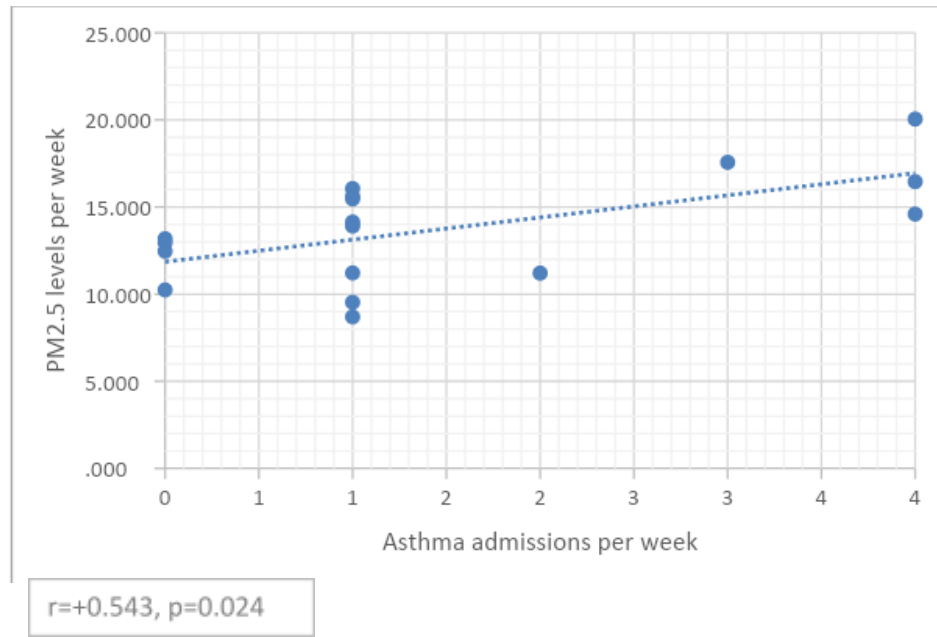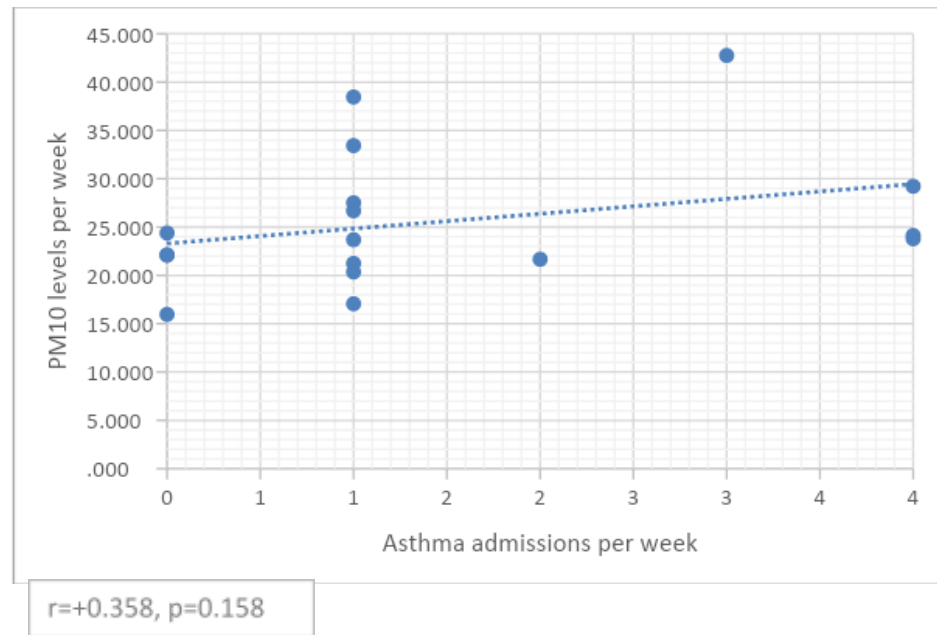

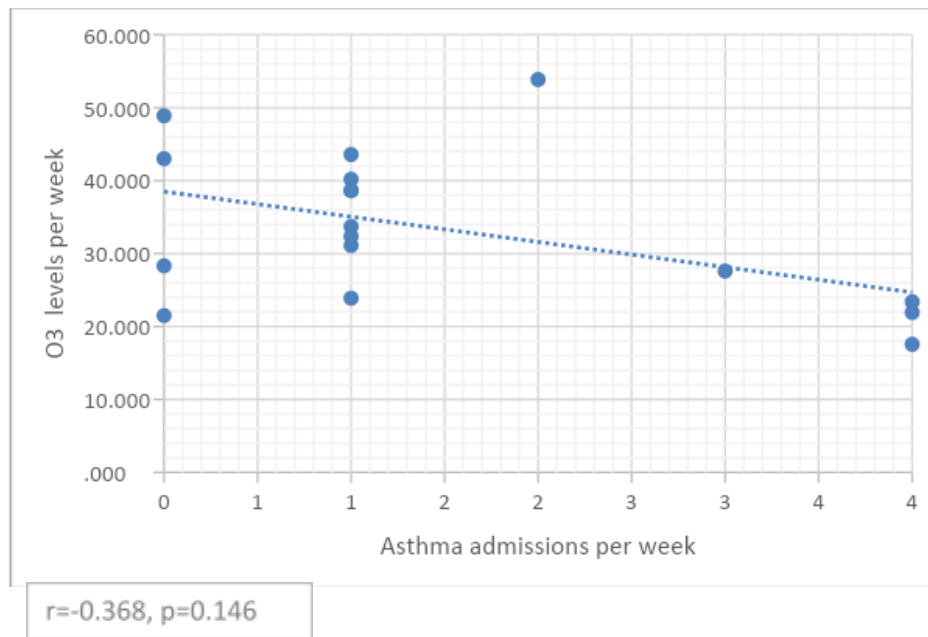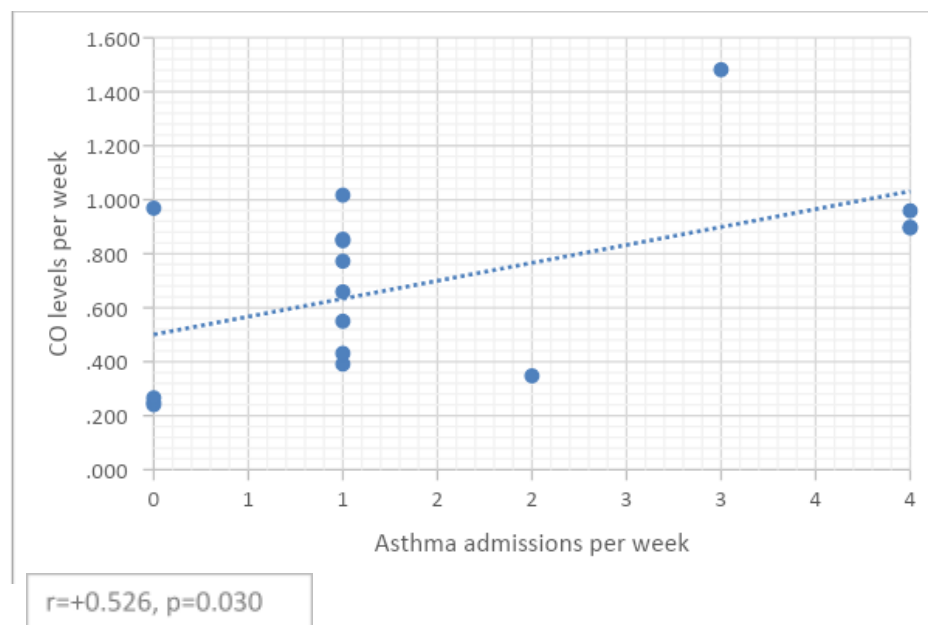

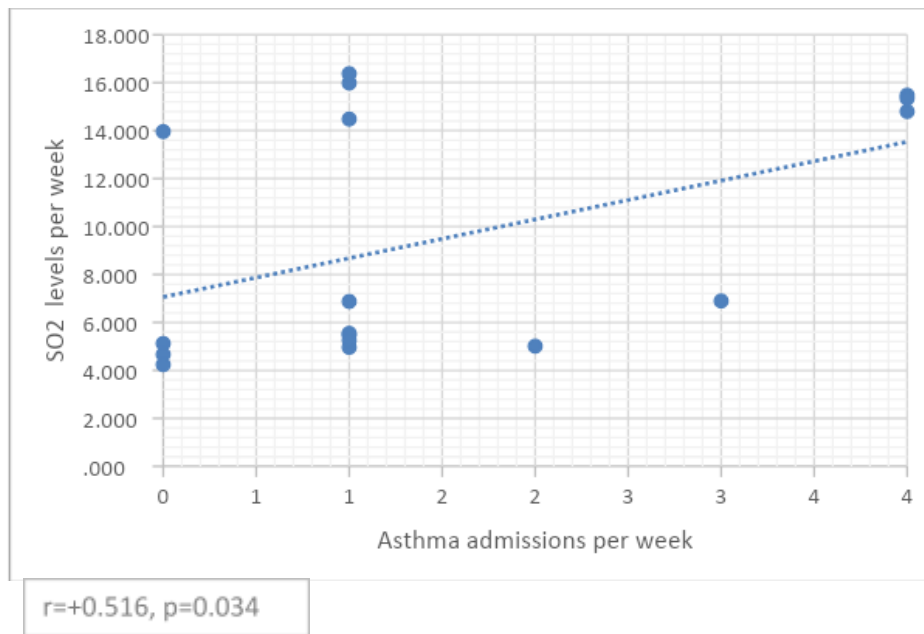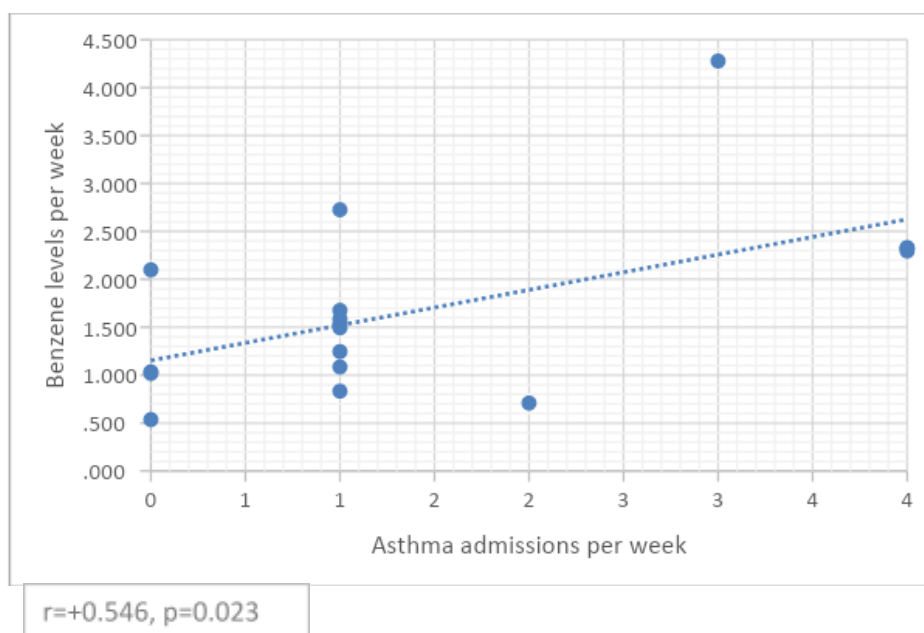

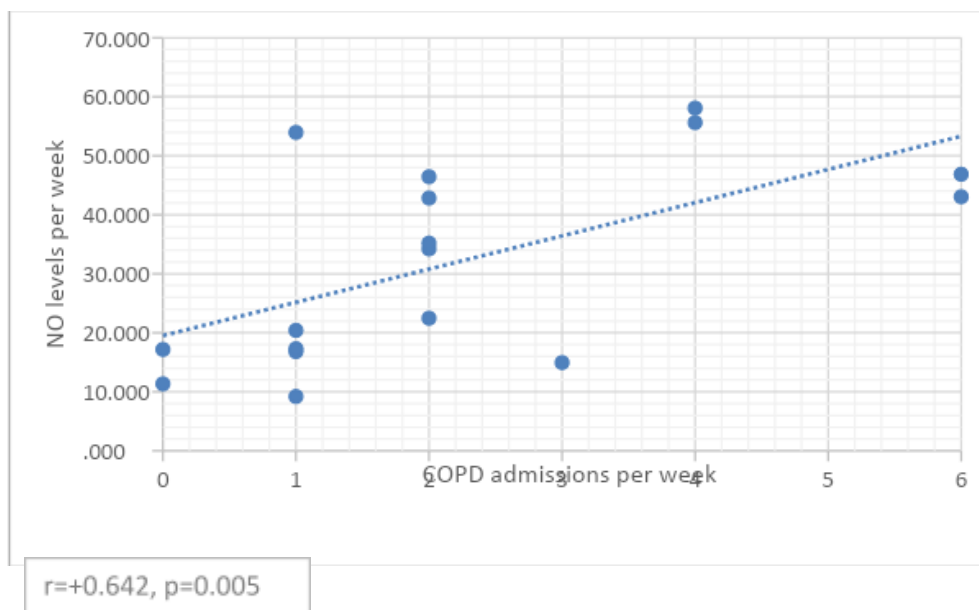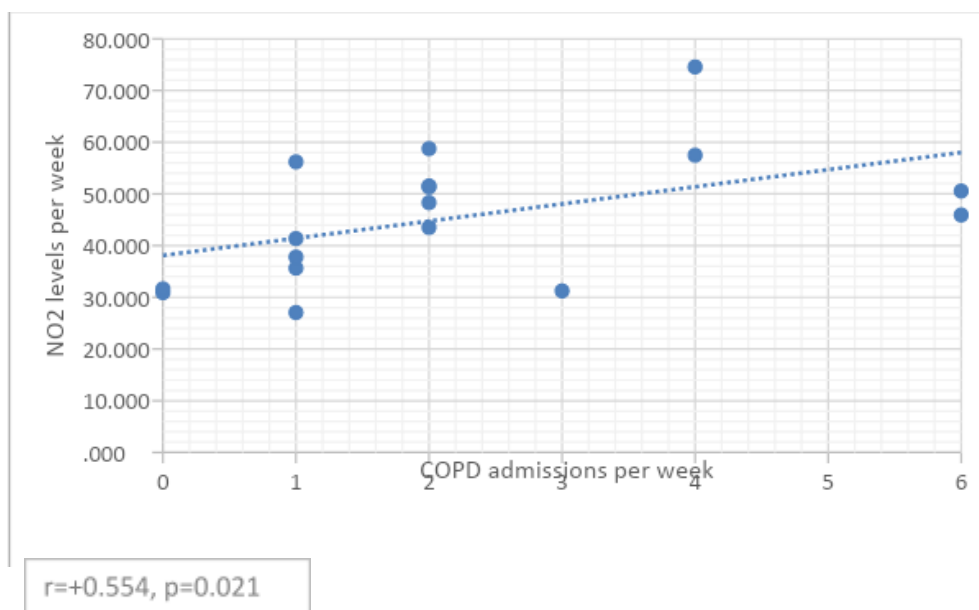

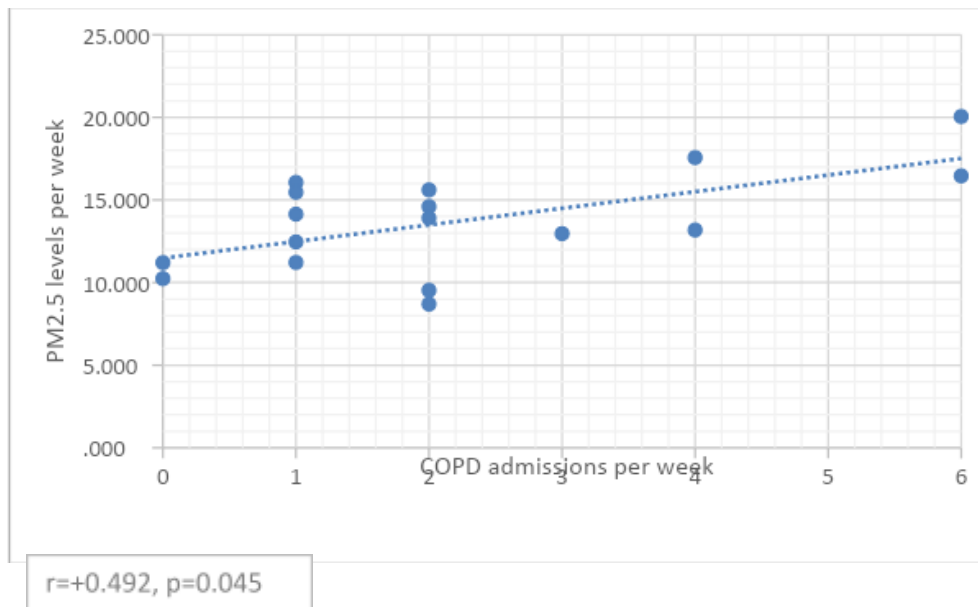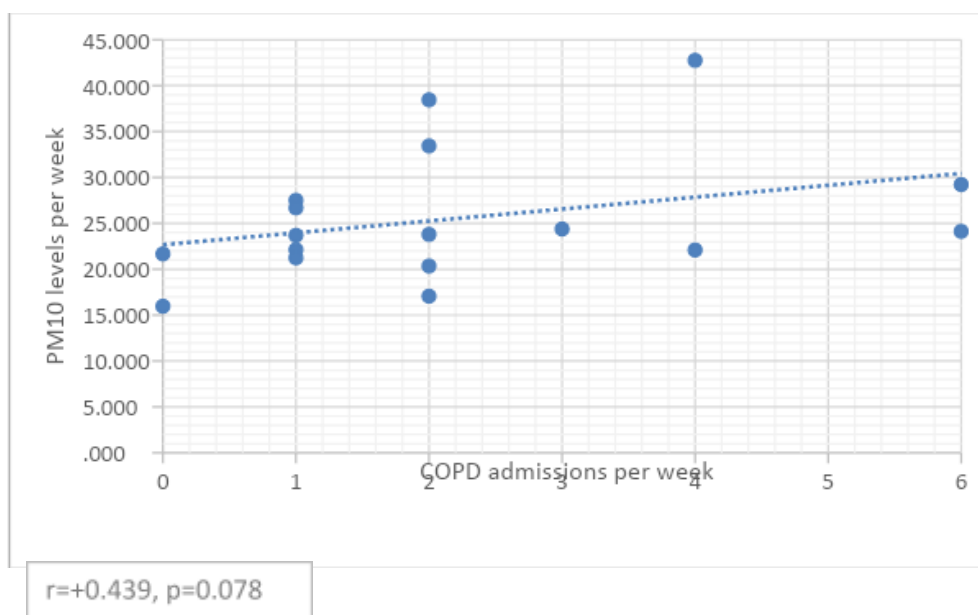

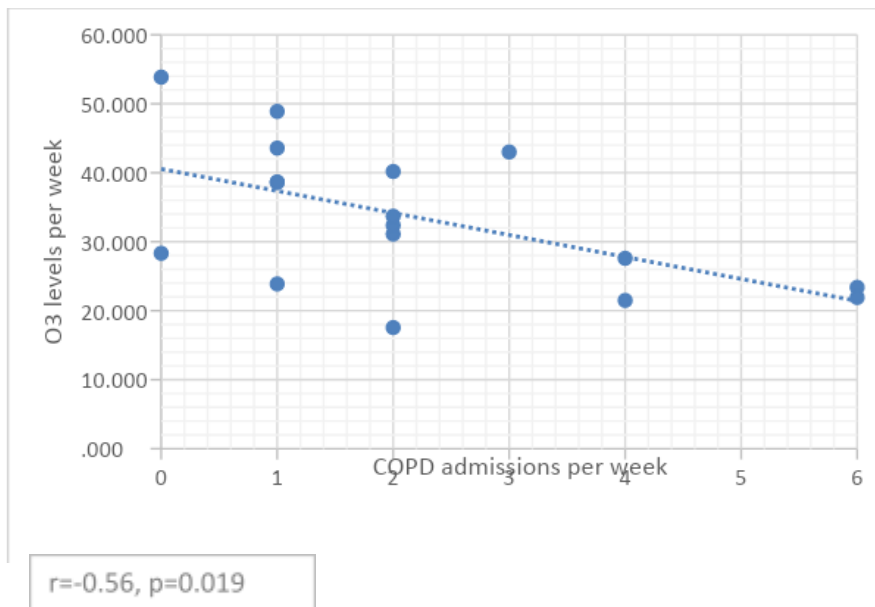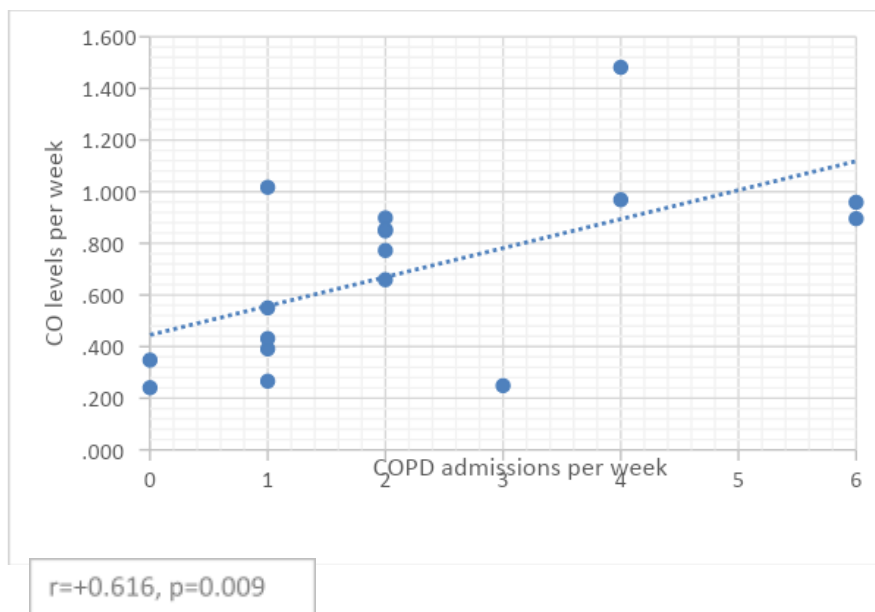

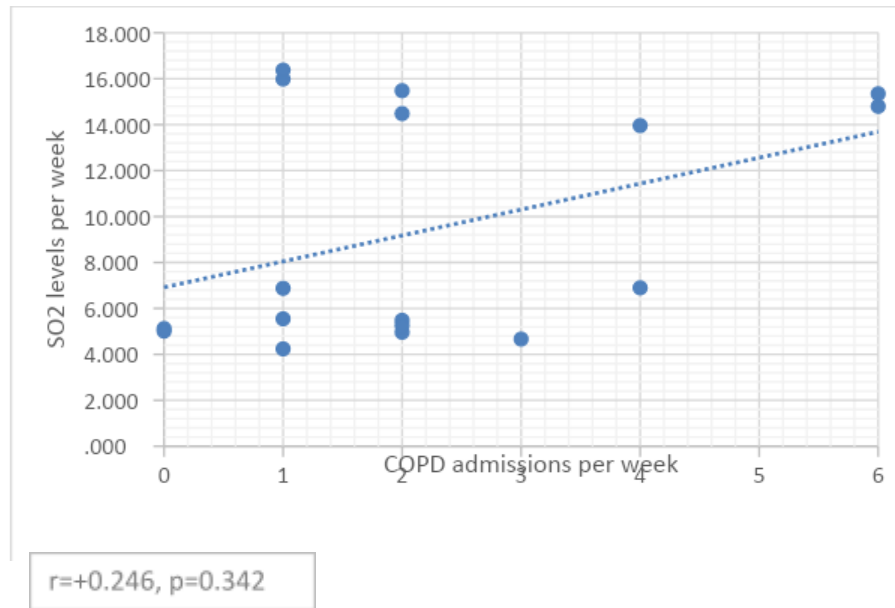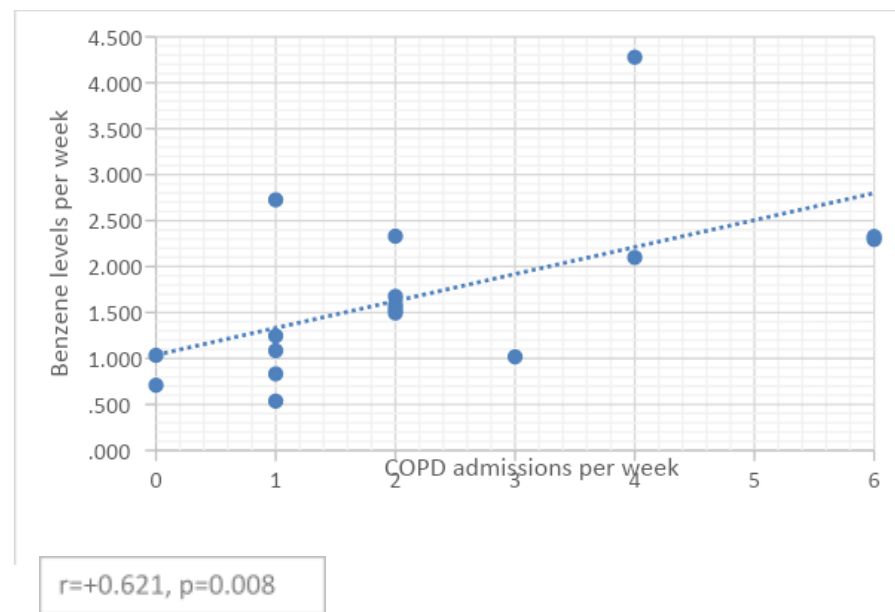

Supplement: Supplementary file 1 [file jpm-11-00867-s001.zip › jpm-1270217-supplementary.pdf]
